# Supplementary material for: Delayed loss of UBE3A reduces the expression of Angelman syndrome-associated phenotypes
Source: PubMed Central journal article supplement (PMC6532248; doi:10.1186/s13229-019-0277-1), 2019-05-22

**A****Ube3a<sup>flox</sup>-Cre<sup>embryo-</sup>**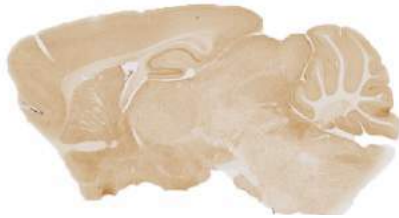**Ube3a<sup>flox</sup>-Cre<sup>embryo+</sup>**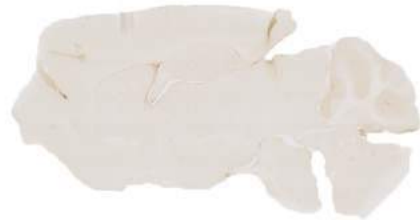**B**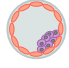

E0

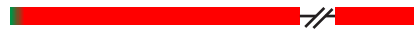WT-Cre<sup>embryo-</sup>WT-Cre<sup>embryo+</sup>Ube3a<sup>flox</sup>-Cre<sup>embryo-</sup>Ube3a<sup>flox</sup>-Cre<sup>embryo+</sup>**C**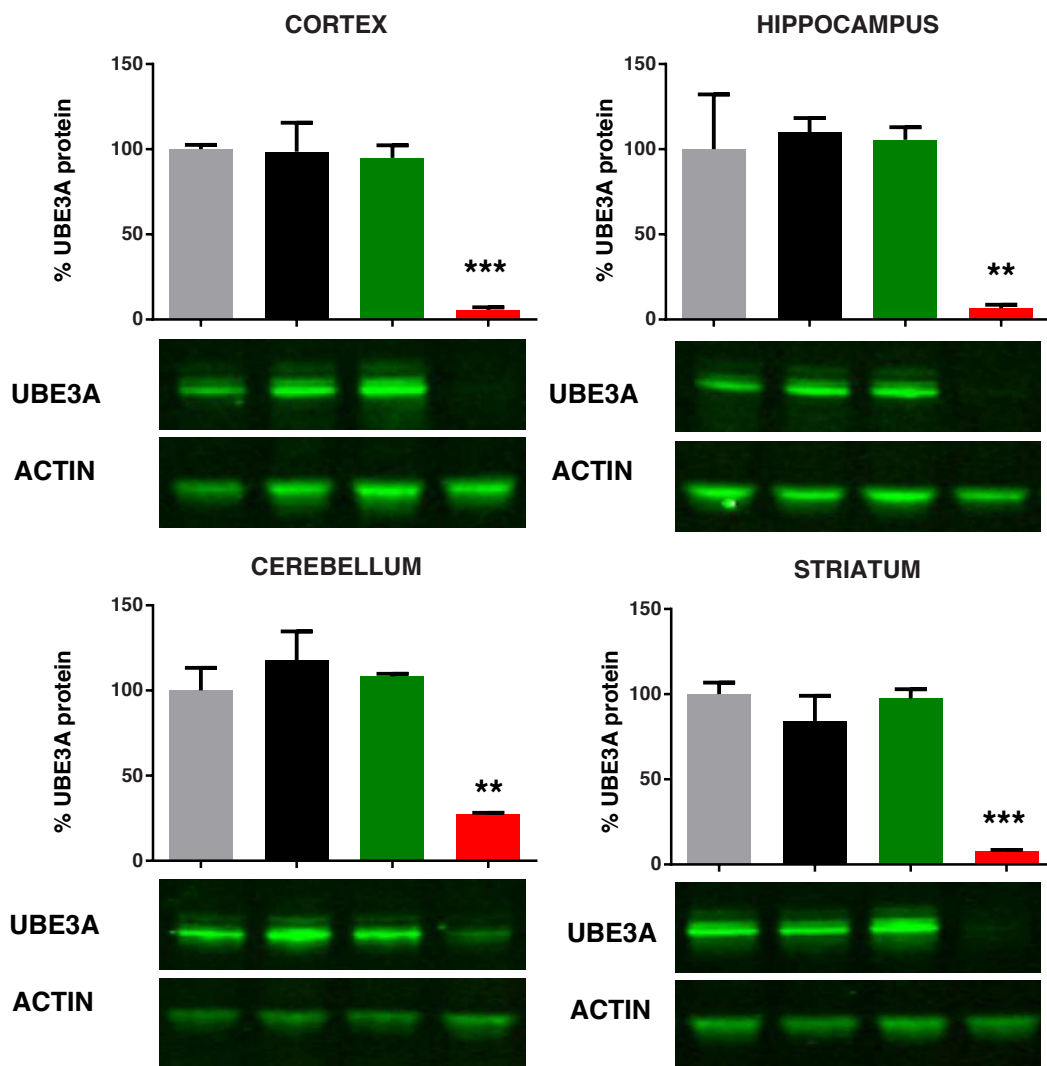

Supplement: 13229_2019_277_MOESM2_ESM.pdf [file 13229_2019_277_MOESM2_ESM.pdf]
