# Supplementary material for: Delayed loss of UBE3A reduces the expression of Angelman syndrome-associated phenotypes
Source: PubMed Central journal article supplement (PMC6532248; doi:10.1186/s13229-019-0277-1), 2019-05-22

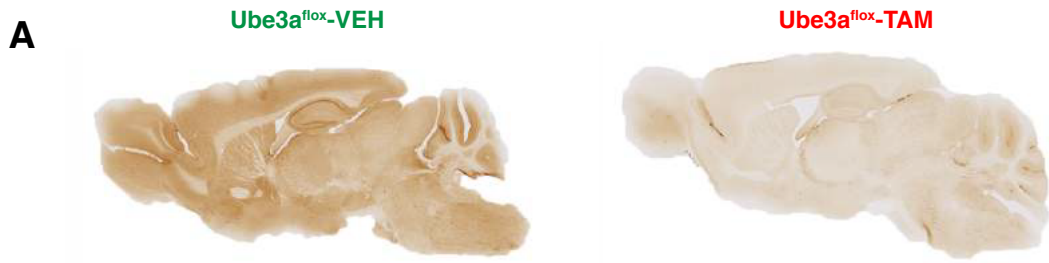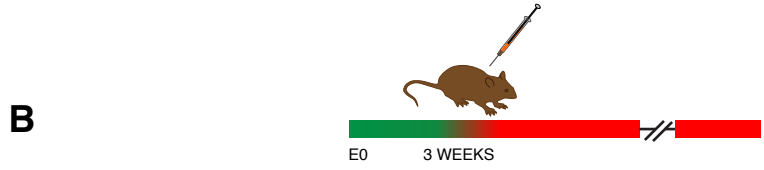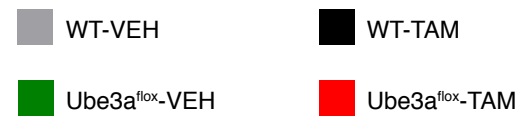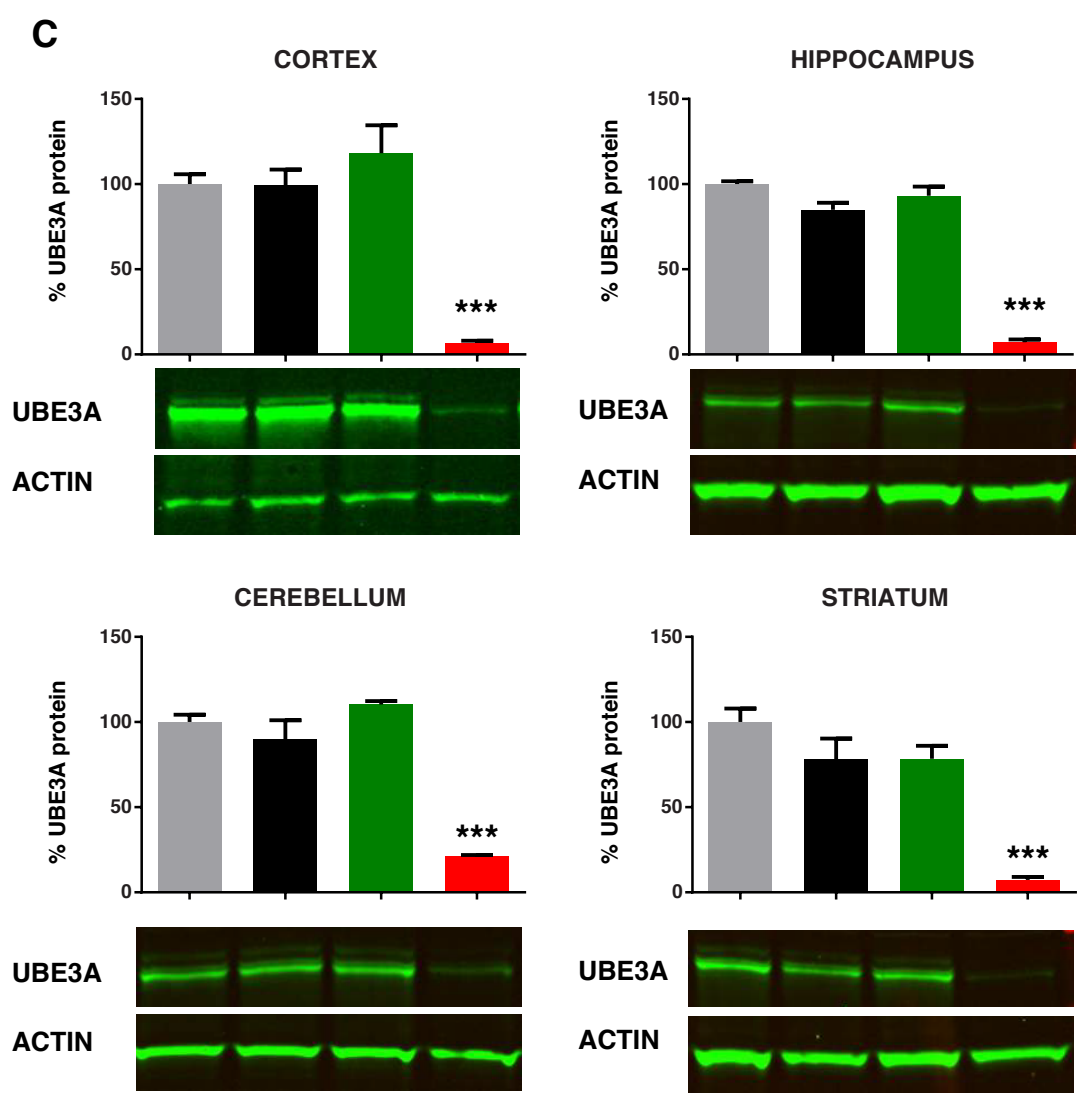

Supplement: 13229_2019_277_MOESM7_ESM.pdf [file 13229_2019_277_MOESM7_ESM.pdf]
