# Supplementary material for: Delayed loss of UBE3A reduces the expression of Angelman syndrome-associated phenotypes
Source: Mol Autism. 2019 May 22;10:23. doi: 10.1186/s13229-019-0277-1 (PMC6532248; doi:10.1186/s13229-019-0277-1)
Supplement: Supplementary file 3 — Table S2. (referring to Additional file 2: Figure S1, Additional file 4: Figure S3, Additional file 8: Figure S4). Summary of the statistical tests used for each Western blot analysis performed on each experimental group. Statistical significance (2-sided, p < 0.05) is indicated by green color. (XLS 30 kb) [file 13229_2019_277_MOESM3_ESM.xls]

## Sheet: Table S2
			UBE3A gene deletion	Brain area	Genotype	UBE3A % (Mean)	Standard deviation	Test statistic	Test statistic value (df)	p value	Posthoc test (Bonferroni) (N)		p value
			Embryonic deletion	cortex	WT-Creembryo-	100	4	Univariate ANOVA	F(3,8)=24.03	<0.001	Ube3aflox-Creembryo+ (3)	WT-Creembryo- (3)	0.001
					WT-Creembryo+	99	29					WT-Creembryo+ (3)	0.001
					Ube3aflox-Creembryo-	95	13					Ube3aflox-Creembryo- (3)	0.001
					Ube3aflox-Creembryo+	6	2
				hippocampus	WT-Creembryo-	100	56	Univariate ANOVA	F(3,8)=8.37	0.008	Ube3aflox-Creembryo+ (3)	WT-Creembryo- (3)	0.029
					WT-Creembryo+	110	14					WT-Creembryo+ (3)	0.016
					Ube3aflox-Creembryo-	106	13					Ube3aflox-Creembryo- (3)	0.021
					Ube3aflox-Creembryo+	7	4
				striatum	WT-Creembryo-	100	12	Univariate ANOVA	F(3,8)=25.85	<0.001	Ube3aflox-Creembryo+ (3)	WT-Creembryo- (3)	<0.001
					WT-Creembryo+	84	24					WT-Creembryo+ (3)	0.001
					Ube3aflox-Creembryo-	97	9					Ube3aflox-Creembryo- (3)	<0.001
					Ube3aflox-Creembryo+	8	1
				cerebellum	WT-Creembryo-	100	23	Univariate ANOVA	F(3,8)=14.75	0.001	Ube3aflox-Creembryo+ (3)	WT-Creembryo- (3)	0.008
					WT-Creembryo+	118	29					WT-Creembryo+ (3)	0.002
					Ube3aflox-Creembryo-	108	3					Ube3aflox-Creembryo- (3)	0.004
					Ube3aflox-Creembryo+	27	2
			Juvenile deletion	cortex	WT-OIL	100	11	Univariate ANOVA	F(3,12)=26.30	<0.001	Ube3aflox-TAM (4)	WT-VEH (4)	<0.001
					WT-TAM	99	18					WT-TAM (4)	<0.001
					Ube3aflox-VEH	118	33					Ube3aflox-VEH (4)	<0.001
					Ube3aflox-TAM	7	2
				hippocampus	WT-OIL	100	3	Univariate ANOVA	F(3,8)=145.46	<0.001	Ube3aflox-TAM (3)	WT-VEH (3)	<0.001
					WT-TAM	85	7					WT-TAM (3)	<0.001
					Ube3aflox-VEH	93	9					Ube3aflox-VEH (3)	<0.001
					Ube3aflox-TAM	7	3
				striatum	WT-OIL	100	8	Univariate ANOVA	F(3,8)=23.90	<0.001	Ube3aflox-TAM (3)	WT-VEH (3)	<0.001
					WT-TAM	78	21					WT-TAM (3)	0.002
					Ube3aflox-VEH	78	13					Ube3aflox-VEH (3)	0.002
					Ube3aflox-TAM	7	3
				cerebellum	WT-OIL	100	7	Univariate ANOVA	F(3,8)=43.64	<0.001	Ube3aflox-TAM (3)	WT-VEH (3)	<0.001
					WT-TAM	90	19					WT-TAM (3)	<0.001
					Ube3aflox-VEH	110	3					Ube3aflox-VEH (3)	<0.001
					Ube3aflox-TAM	21	1
			Adult deletion	cortex	WT-OIL	100	8	Univariate ANOVA	F(3,8)=48.44	<0.001	Ube3aflox-TAM (3)	WT-VEH (3)	<0.001
					WT-TAM	96	20					WT-TAM (3)	<0.001
					Ube3aflox-VEH	106	10					Ube3aflox-VEH (3)	<0.001
					Ube3aflox-TAM	6	1
				hippocampus	WT-OIL	100	7	Univariate ANOVA	F(3,8)=72.33	<0.001	Ube3aflox-TAM (3)	WT-VEH (3)	<0.001
					WT-TAM	99	15					WT-TAM (3)	<0.001
					Ube3aflox-VEH	93	8					Ube3aflox-VEH (3)	<0.001
					Ube3aflox-TAM	7	1
				striatum	WT-OIL	100	12	Univariate ANOVA	F(3,8)=33.43	<0.001	Ube3aflox-TAM (3)	WT-VEH (3)	<0.001
					WT-TAM	103	17					WT-TAM (3)	<0.001
					Ube3aflox-VEH	90	14					Ube3aflox-VEH (3)	<0.001
					Ube3aflox-TAM	14	3
				cerebellum	WT-OIL	100	14	Univariate ANOVA	F(3,8)=23.22	<0.001	Ube3aflox-TAM (3)	WT-VEH (3)	0.001
					WT-TAM	96	21					WT-TAM (3)	0.001
					Ube3aflox-VEH	91	11					Ube3aflox-VEH (3)	0.001
					Ube3aflox-TAM	17	6
